# Supplementary material for: A hypothalamus-habenula circuit controls aversion
Source: PubMed Central journal article supplement (PMC6756229; doi:10.1038/s41380-019-0369-5), 2019-02-12
Supplement: 41380_2019_369_MOESM2_ESM.pdf [file 41380_2019_369_MOESM2_ESM.pdf]

**Supplementary Table 1**

| Paradigm                       | Mouse genotype       | Number of mice | Virus                           | Volume (nl) | Inj. site | Optical fiber placement | Stimulation parameters                                         | Effect           | c-fos       | Figure       |
|--------------------------------|----------------------|----------------|---------------------------------|-------------|-----------|-------------------------|----------------------------------------------------------------|------------------|-------------|--------------|
| <b>Place preference</b>        | Wild-type            | 6              | AAV DIO EYFP                    | 200         | LHA       | LHb (terminals)         | 60 Hz, 1ms pulse, 10mw, 447nm laser                            | —                |             | Fig.3G       |
|                                | Vglut2-Cre           | 16*            | AAV DIO ChR2-mCherry            | 70          | LHA       | LHb (terminals)         | 60 Hz in 10 mice, 30 Hz in 6 mice 1ms pulse, 10mw, 447nm laser | Negative valence |             | Fig.3D-F, G  |
|                                | Vglut2-Cre/Vgat-Flpo | 6*             | AAV Cre-on/Flpo-on ChR2-EYFP    | 200         | GPI       | GPI (cell bodies)       | 30 Hz, 5ms pulse, 10mw, 447nm laser                            | —                | Fig. S3A-F  | Fig.3A-C, G  |
|                                | Vglut2-Cre           | 6              | AAV DIO ChR2-mCherry            | 70          | GPI       | LHb (terminals)         | 60 Hz, 1ms pulse, 10mw, 447nm laser                            | —                |             | Fig.3G       |
|                                | Wild-type            | 7              | AAV CAG ChR2-mCherry            | 70          | GPI       | LHb (terminals)         | 60 Hz, 1ms pulse, 10mw, 447nm laser                            | —                |             | Fig.3G       |
|                                | Sst-Cre              | 22             | AAV DIO ChR2-mCherry            | 200         | GPI       | LHb (terminals)         | 60 Hz, 1ms pulse, 10mw, 447nm laser                            | —                |             | Fig.3G       |
|                                | Sst-Cre              | 6              | Retrograde AAV DIO ChR2-mCherry | 200         | GPI       | GPI (cell bodies)       | 30 Hz, 5ms pulse, 10mw, 447nm laser                            | —                | Fig. S3G-L  | Fig.3G       |
| <b>Probabilistic switching</b> | Vglut2-Cre           | 5*             | AAV DIO ChR2-mCherry            | 70          | LHA       | LHb (terminals)         | 30 Hz, 5ms pulse, 10mw, 447nm laser                            | Negative valence |             | Fig.3J, L, N |
|                                | Vglut2-Cre/Vgat-Flpo | 5*             | AAV Cre-on/Flpo-on ChR2-EYFP    | 200         | GPI       | GPI (cell bodies)       | 30 Hz, 5ms pulse, 10mw, 447nm laser                            | —                | Fig. S3A-F* | Fig.3K, M, O |

\* 5 mice used in both paradigms
