# Supplementary material for: A hypothalamus-habenula circuit controls aversion
Source: PubMed Central journal article supplement (PMC6756229; doi:10.1038/s41380-019-0369-5), 2019-02-12

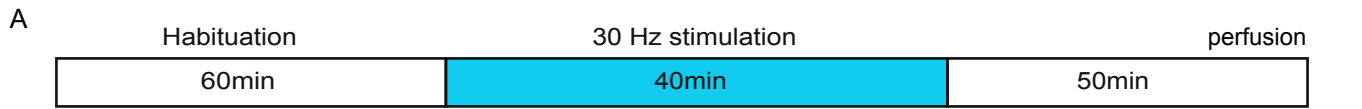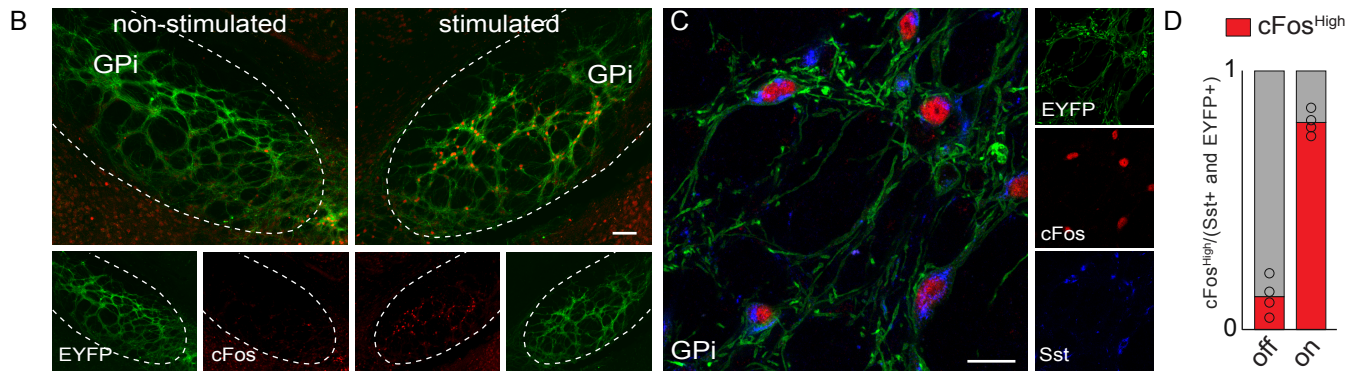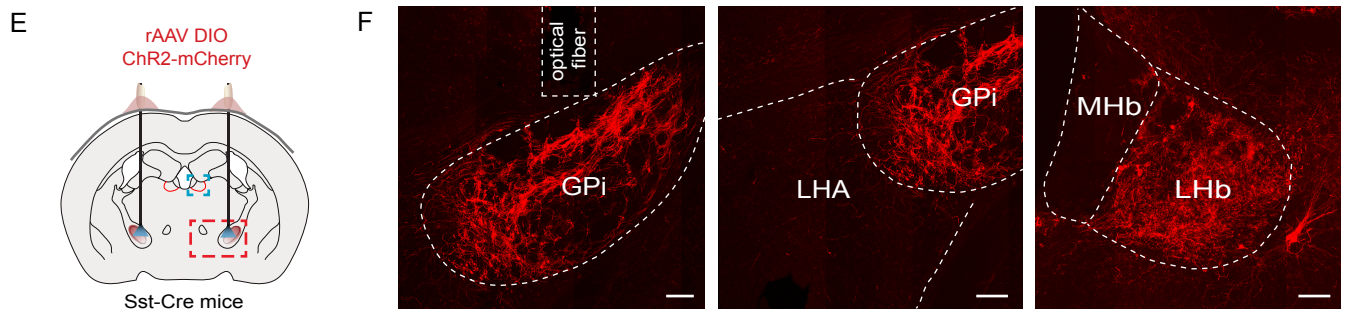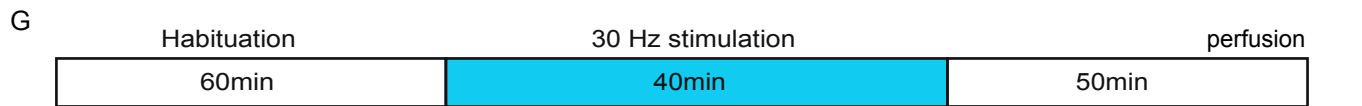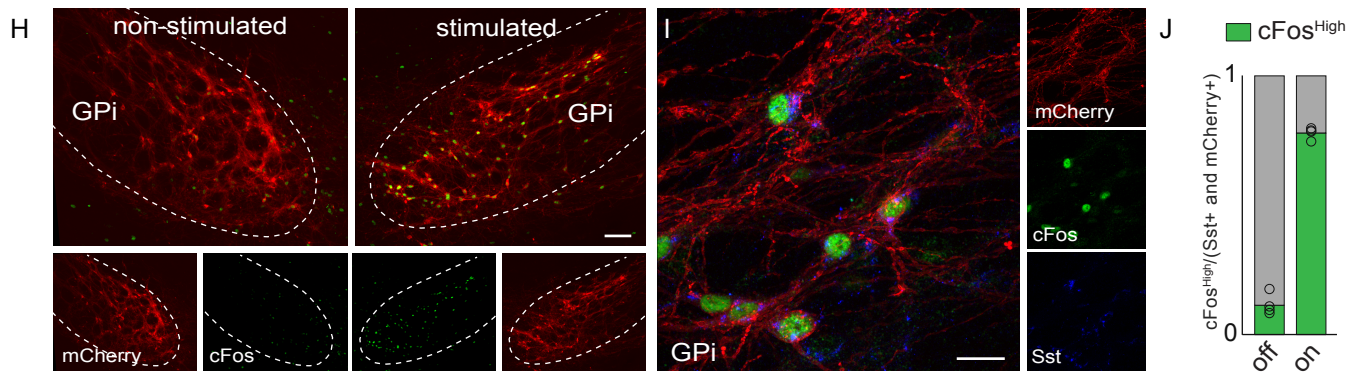

Supplement: 41380_2019_369_MOESM11_ESM.pdf [file 41380_2019_369_MOESM11_ESM.pdf]
