# Supplementary material for: A hypothalamus-habenula circuit controls aversion
Source: PubMed Central journal article supplement (PMC6756229; doi:10.1038/s41380-019-0369-5), 2019-02-12

**A** Training and testing schedule in operant and fear conditioning

| training 1-2 weeks            | test day 1:                   |                              | test day 2:                   |                              | test day 3:                   |                              |
|-------------------------------|-------------------------------|------------------------------|-------------------------------|------------------------------|-------------------------------|------------------------------|
| operant conditioning<br>45min | operant conditioning<br>45min | fear conditioning<br>5 CS/US | operant conditioning<br>45min | fear conditioning<br>5 CS/US | operant conditioning<br>45min | fear conditioning<br>5 CS/US |

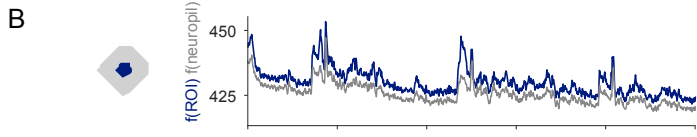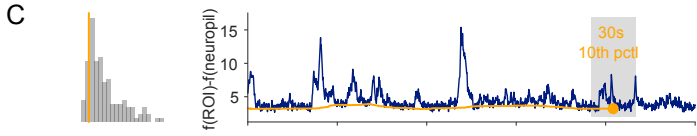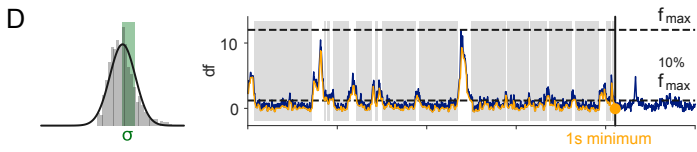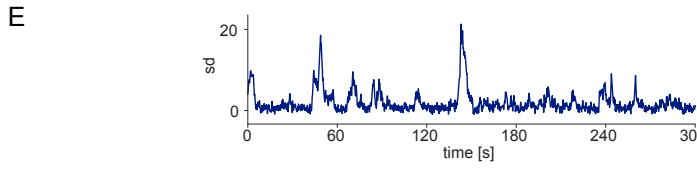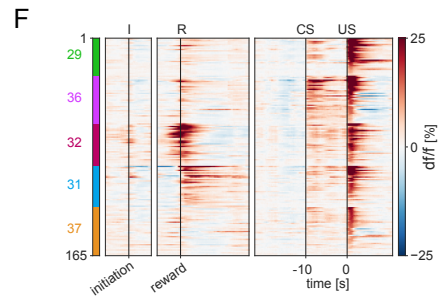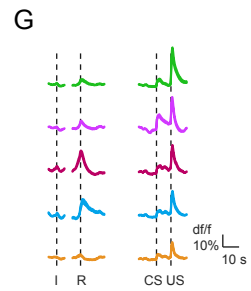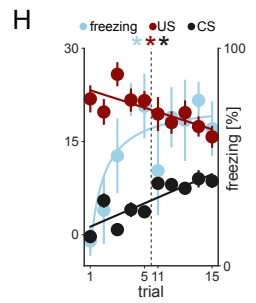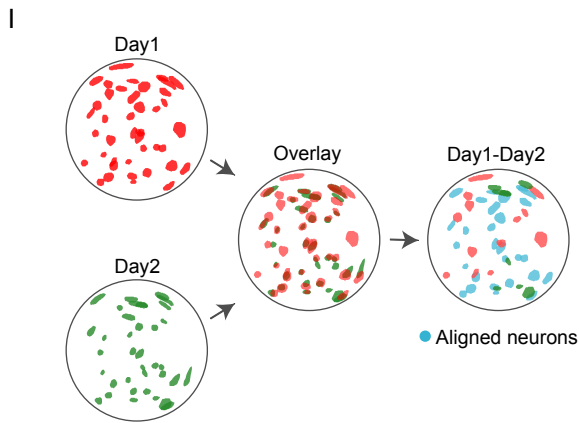

Supplement: 41380_2019_369_MOESM13_ESM.pdf [file 41380_2019_369_MOESM13_ESM.pdf]
